# Supplementary material for: A workplace mindfulness training program may affect mindfulness, well-being, health literacy and work performance of upper-level ICT-managers: An exploratory study in times of the COVID-19 pandemic
Source: Frontiers journal article supplement (doi:10.3389/fpsyg.2023.994959), 2023-04-20
Supplement: Data_Sheet_1.pdf [file Data_Sheet_1.pdf]

*Supplementary Material 2: Additional information on scales*

**A Workplace Mindfulness Training Program May Affect Mindfulness, Well-Being, Health Literacy and Work Performance of Upper-Level ICT-Managers: An Exploratory Study in Times of the COVID-19 Pandemic**

**Kristina Schubin\*, Laura Seinsche, Holger Pfaff and Sabrina Zeike**

**\* Correspondence:** Kristina Schubin: [kristina.schubin@uni-koeln.de](mailto:kristina.schubin@uni-koeln.de)

**TABLE 1** | 'Health Literacy' scale.

| Items                                                                                                    | Response options                                                                           |
|----------------------------------------------------------------------------------------------------------|--------------------------------------------------------------------------------------------|
| I take care of my health, even if it costs money, time and personal energy.                              | 1 = Strongly disagree<br>2 = Somewhat disagree<br>3 = Somewhat agree<br>4 = Strongly agree |
| I plan my life so that I stay healthy.                                                                   |                                                                                            |
| I know exactly how to maintain my health and stay up to date on this through books and various media.    |                                                                                            |
| I set clear goals for my physical and mental fitness.                                                    |                                                                                            |
| I have made it a habit to maintain my health and live healthy.                                           |                                                                                            |
| As far as my health is concerned, I am very much in control of myself and can manage myself effectively. |                                                                                            |

**TABLE 2 |** 'Subjective Training Benefits' scale.

| Items                                                                                          | Response options                                                                           |
|------------------------------------------------------------------------------------------------|--------------------------------------------------------------------------------------------|
| The intervention enabled me to sustainably integrate more mindfulness into my daily life.      | 1 = Strongly disagree<br>2 = Somewhat disagree<br>3 = Somewhat agree<br>4 = Strongly agree |
| The intervention helped me to pay more attention to myself and my health.                      |                                                                                            |
| The intervention increased my awareness of my health and mindfulness.                          |                                                                                            |
| The intervention encouraged me to incorporate small moments of mindfulness into my daily life. |                                                                                            |
| The intervention encouraged me to take occasional breaks to foster my mindfulness.             |                                                                                            |

**TABLE 3 |** Exploratory Factor Analysis of the Items of the Subjective Training Benefits scale.

| Items                                                                                          | Factor 1 loading |
|------------------------------------------------------------------------------------------------|------------------|
| The intervention enabled me to sustainably integrate more mindfulness into my daily life.      | .724             |
| The intervention helped me to pay more attention to myself and my health.                      | .842             |
| The intervention increased my awareness of my health and mindfulness.                          | .745             |
| The intervention encouraged me to incorporate small moments of mindfulness into my daily life. | .699             |
| The intervention encouraged me to take occasional breaks to foster my mindfulness.             | .603             |

*Extraction method: Principal components analysis; Varimax rotation could not be conducted since only one component was extracted. Factor eigenvalue: 2.639. The factor explained 52,8% of variance in variables. The scree plot suggested a one factor solution.*
