# Supplementary material for: A workplace mindfulness training program may affect mindfulness, well-being, health literacy and work performance of upper-level ICT-managers: An exploratory study in times of the COVID-19 pandemic
Source: Front Psychol. 2023 Apr 20;14:994959. doi: 10.3389/fpsyg.2023.994959 (PMC10158731; doi:10.3389/fpsyg.2023.994959)
Supplement: Supplementary file 2 [file Table_1.xlsx]

## Sheet: Sheet1
			Supplementary Material 1: Coding scheme
A Workplace Mindfulness Training Program May Affect Mindfulness, Well-Being, Health Literacy and Work Performance of Upper-Level ICT-Managers: An Exploratory Study in Times of the COVID-19 Pandemic
			Kristina Schubin*, Laura Seinsche, Holger Pfaff and Sabrina Zeike
			* Correspondence: Kristina Schubin: kristina.schubin@uni-koeln.de
Question	Category	Sub-category					number of codes
What do you think needs to be improved in your working conditions to make them more conducive to your health?	change of work conditions\ increasing job resources
		increasing autonomy
			workload reduction				4
			prioritization				1
			less time pressure				2
			time freedom				6
		demarcation between work and leisure					2
		fixed workplace and work environment					2
		attitude regarding mindfulness					6
		retreat spaces					5
		regulations					2
		role of supervisor					4
		sharing of information					1
		other					7
What form of digital and non-digital support do you need from your company in order to apply what you have learned in the training in the long term? Please name the three most important supporting factors.	facilitators
		contextual factors work environment
			budget				2
			autonomy				8
				time autonomy			22
					breaks		2
			rooms				8
		means and gadgets					2
			app				9
			learning material				4
				knowledge			2
		culture and attitude
			health culture				9
				communication			4
				role modelling			5
					others from work place environment practice mindfulness		1
			acceptance				11
			support from supervisor				4
			support from others				2
				networking			1
			focus				4
			personal attitude and skills				8
		training offers					8
		training in presence					1
		online training					3
		repetition					6
			integrated in work routines				1
		trainer					8
		coaching					9
		reminder of training					2
		other					4
What are the reasons, if you don't apply what you have learned in your day-to-day work?	barriers						1
		lack of rooms					3
		lack of repetition					2
		complexity					2
		lack of culture (and acceptance)					6
		distributed team					1
		lack of prioritization by supervisors					6
			no focus on mindfulness				2
		time pressure					6
		noise level					1
		work-related reachability					3
		high work load					3
		nothing					5
		lack of time					7
			travel				1
		lack of motivation					1
			lack of energy				2
		working from home					2
Are there any other positive effects of the training that you can observe?	positive effects
		more conversation about mindfulness					2
		more conscious perception					4
		more reflection					1
		acceptance for mindfulness practice increased					1
		follow up activities					1
			joint mindfulness exercise before team meeting				2
			new working time arrangements				1
		Behaviors integrated in everyday life due to mindfulness trainings					4
			breathing exercise				1
			meditation				1
			eating habits				1
			sport exercise				1
We thank you very much for your important cooperation! At this point there is space for your comments or feedback.	feedback regarding effectiveness						6
		increase of well-being					1
	desire for roll-out						4
total number of codes							282
